# Supplementary material for: PENINGKATAN KETERAMPILAN MENULIS KARANGAN DESKRIPSI MELALUI STRATEGI SKETSA PANORAMA :Penelitian Efektivitas Pembelajaran Menulis di Kelas V SD Negeri Mangkubumi 3 Kota Tasikmalaya
Source: Royal Society of Chemistry journal article supplement (doi:10.1039/c5tb01474c), 2011-08-11
Supplement: c5tb01474c1.pdf [file c5tb01474c1.pdf]

**Electronic Supplementary Information for:**

**Multiple noncovalent interactions mediated one-pot therapeutic assemblies for effective treatment of atherosclerosis**

*Yin Dou<sup>a,b,1</sup>, Xiangjun Zhang<sup>a,1</sup>, Xiaoqiu Xu<sup>a</sup>, Xing Zhou<sup>a</sup>, Songling Han<sup>a</sup>, Ruibing Wang<sup>c</sup>, Min Su<sup>a,\*</sup>, Xiaohui Li<sup>b,\*</sup>, Jianxiang Zhang<sup>a,\*</sup>*

<sup>a</sup>Department of Pharmaceutics, College of Pharmacy, Third Military Medical University, Chongqing 400038, China.

<sup>b</sup>Institute of Materia Medica, College of Pharmacy, Third Military Medical University, Chongqing 400038, China.

<sup>c</sup>State Key Laboratory of Quality Research in Chinese Medicine, Institute of Chinese Medical Sciences, University of Macau, Taipa, Macau.

<sup>1</sup>These authors contributed equally.

**Table S1.** Estimated binding energy values using different searching algorithms.

| Algorithm | Estimated binding energies (kcal/mol) |       |
|-----------|---------------------------------------|-------|
|           | RAP                                   | IND   |
| GA        | -4.63                                 | -3.18 |
| LGA       | -5.8                                  | -5.0  |
| LS        | -4.38                                 | -2.79 |
| SA        | -2.26                                 | -2.11 |

It should be noted that LGA predicted the strongest affinity between PNIPAm and IND or RAP.

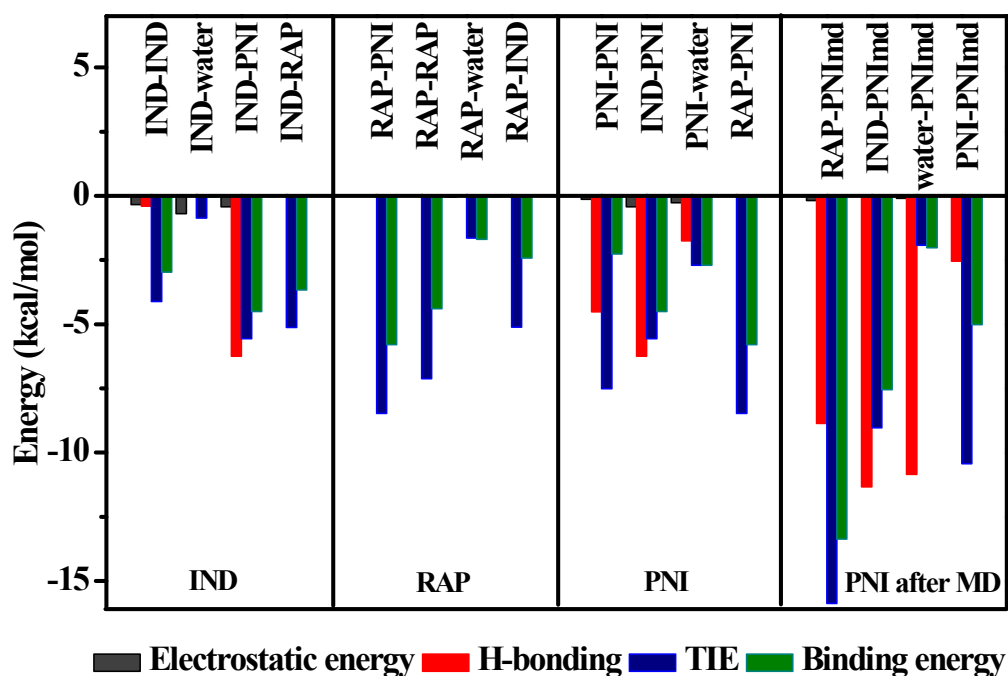

**Figure S1.** Calculated values of intermolecular energies and binding energy between two component pairs of IND, RAP, initially minimized conformation of PNIPAm (PNI), conformation of PNIPAm after a MD stimulation (PNI<sub>md</sub>) and water. TIE represents the total intermolecular energy including van der Waals forces, H-bonding, and desolvation interaction.

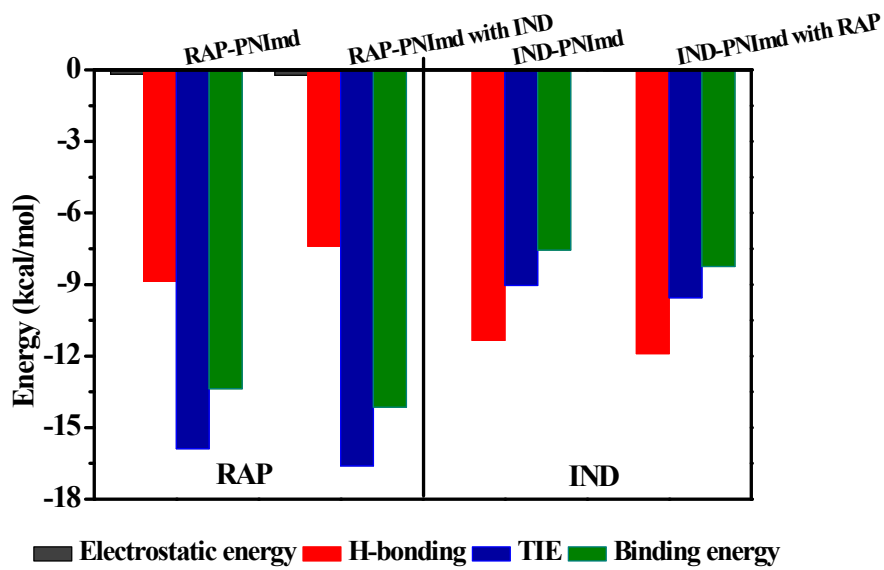

**Figure S2.** Estimated values of intermolecular energies and binding energy between RAP and PNIPAm with or without IND as well as those between IND and PNIPAm with or without RAP. TIE means the total intermolecular energy including van der Waals forces, H-bonding, and desolvation interaction.

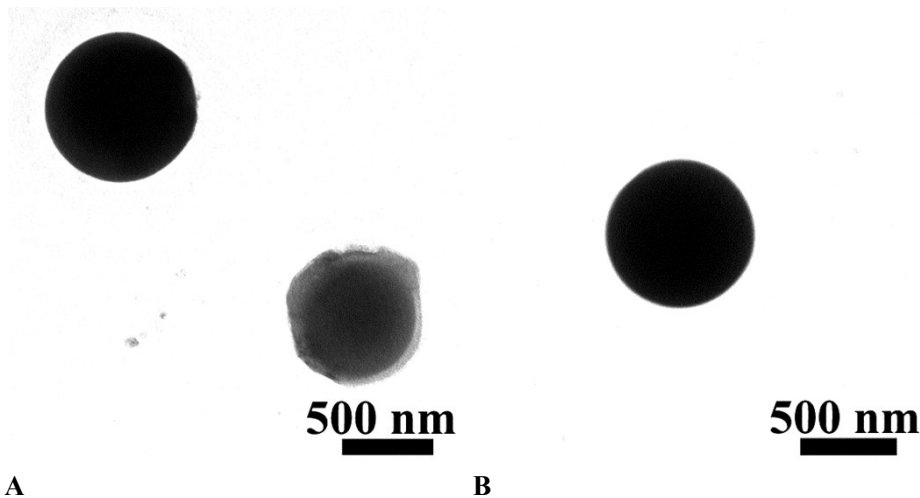

**Figure S3.** TEM images of RAP microspheres fabricated by an emulsion technique using PLGA (A) or S100 (B). The mean size of RAP/PLGA and RAP/S100 microspheres was  $672 \pm 11$  and  $668 \pm 44$  nm, while the RAP loading content was 18.1% and 17.2%, respectively.

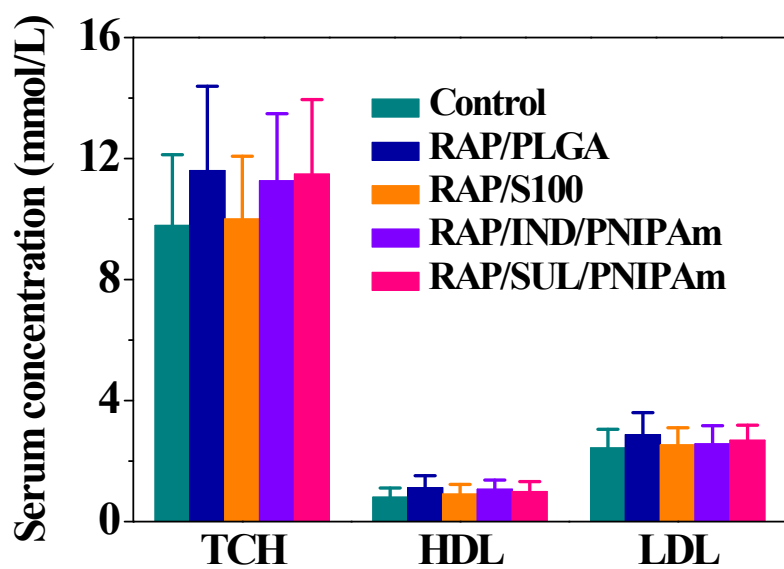

**Figure S4.** The serum levels of typical lipids. TCH, total cholesterol; LDL, low-density lipoprotein; and HDL, high-density lipoprotein. Data are mean  $\pm$  S.D. (n = 6).
